# Supplementary material for: The Controlled Release and Prevention of Abdominal Adhesion of Tannic Acid and Mitomycin C-Loaded Thermosensitive Gel
Source: MDPI journal article supplement (doi:10.3390/polym15040975), 2023-02-16
Supplement: s1 [file s1]

Table S1. Results of Orthogonal design

| Number of tests | A      | B      | C      | Black | Phase transition time (s) |
|-----------------|--------|--------|--------|-------|---------------------------|
| 1               | 1      | 1      | 1      | 1     | 85                        |
| 2               | 1      | 2      | 2      | 2     | 78                        |
| 3               | 1      | 3      | 3      | 3     | 80                        |
| 4               | 2      | 1      | 2      | 3     | 120                       |
| 5               | 2      | 2      | 3      | 1     | 135                       |
| 6               | 2      | 3      | 1      | 2     | 93                        |
| 7               | 3      | 1      | 3      | 2     | 98                        |
| 8               | 3      | 2      | 1      | 3     | 81                        |
| 9               | 3      | 3      | 2      | 1     | 63                        |
| K1              | 243    | 303    | 259    | 283   |                           |
| K2              | 348    | 294    | 261    | 269   |                           |
| K3              | 242    | 236    | 313    | 281   |                           |
| k1              | 81.00  | 101.00 | 87.33  | 94.33 |                           |
| k2              | 116.00 | 98.00  | 87.00  | 89.67 |                           |
| k3              | 80.67  | 78.67  | 104.33 | 93.67 |                           |
| R               | 35.33  | 22.33  | 18.00  | 4.67  |                           |
